# Supplementary material for: A new generation of highly sensitive luminescent thermometers operating in the optical window of biological tissues
Source: Royal Society of Chemistry journal article supplement (doi:10.1039/c6tc01484d), 2016-01-01
Supplement: c6tc01484d1.pdf [file c6tc01484d1.pdf]

Supporting Information

## New generation of highly sensitive luminescent thermometers operating in optical window of biological tissues

Lukasz Marciniak<sup>†\*</sup>, Artur Bednarkiewicz<sup>†</sup>, Diana Kowalska<sup>†</sup>, Wieslaw Strek<sup>†</sup>

<sup>†</sup> Institute of Low Temperature and Structure Research, Polish Academy of Sciences, Okólna 2, 50-422 Wrocław, Poland

### Corresponding Author

\*Lukasz Marciniak

[l.marciniak@int.pan.wroc.pl](mailto:l.marciniak@int.pan.wroc.pl)

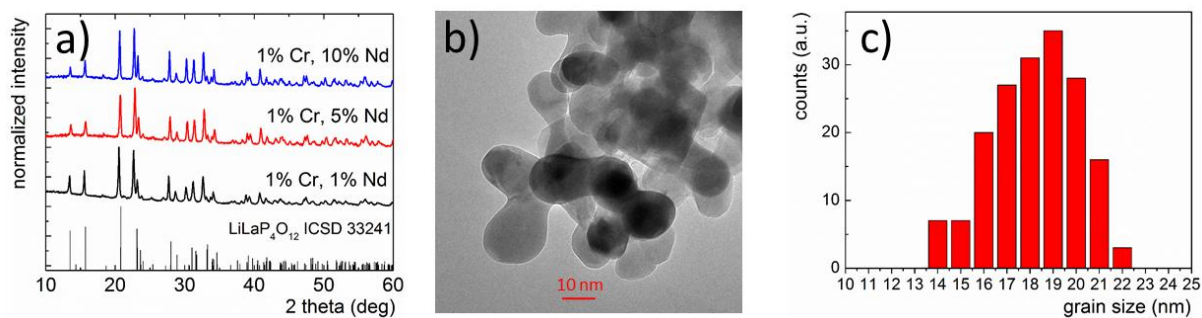

Fig. S1. X-ray diffraction patterns of LiLaP<sub>4</sub>O<sub>12</sub>:Cr,Nd nanocrystals-a; and representative TEM image –b with grain size distribution-c.

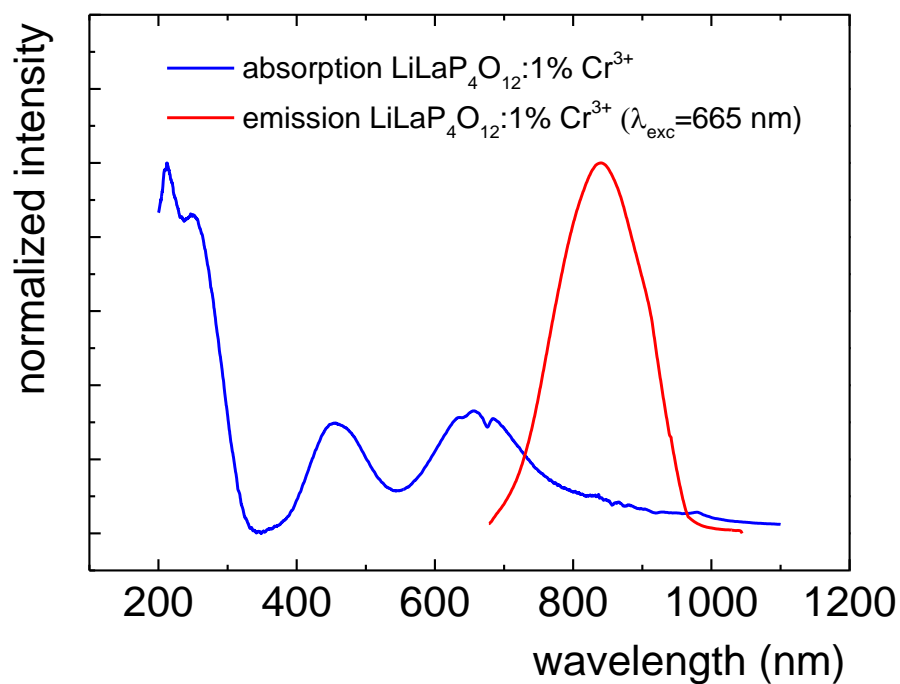

Fig. S2. Comparison of absorption and emission spectra of  $\text{LiLaP}_4\text{O}_{12}:1\% \text{Cr}$  nanocrystals

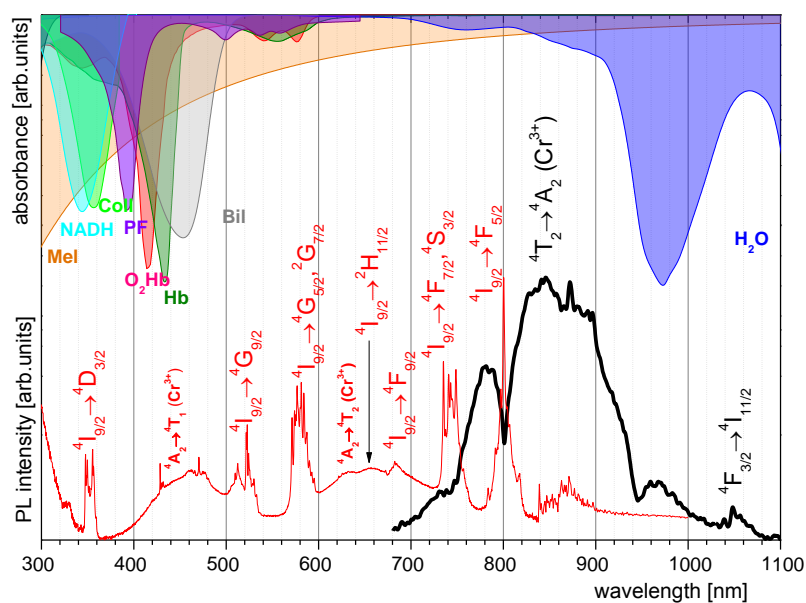

Fig. S 3. Comparison of absorption and emission spectra of  $\text{LiLaP}_4\text{O}_{12}:\text{Cr},\text{Nd}$  nanocrystals with absorption of biological molecules Mel-melanine, NADH – Nicotinamide adenine dinucleotide, coll – collagen, PF – protophorphirin, O<sub>2</sub>Hb – oxygenated hemoglobin, Hb- deoxygenated hemoglobin, Bil-Billirubine, H<sub>2</sub>O - water

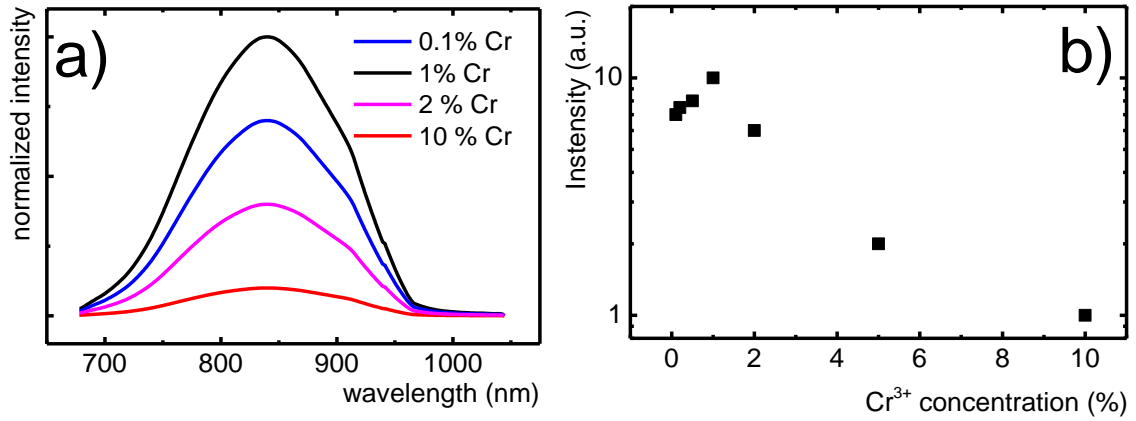

Fig. S4. Emission spectra of LiLaP<sub>4</sub>O<sub>12</sub>:Cr nanocrystals with different concentration of Cr<sup>3+</sup> ions –a and integral emission intensity as a function of Cr<sup>3+</sup> concentration-b

The crossing point between ground state parabola and <sup>4</sup>T<sub>2</sub> parabola of Cr<sup>3+</sup> ion in LiLaP<sub>4</sub>O<sub>12</sub> nanocrystals (activation energy) was determined basing on temperature dependence of emission intensity of LiLaP<sub>4</sub>O<sub>12</sub>:Cr nanocrystals for different concentration of Cr<sup>3+</sup> ions (Fig. S4) using following equation:

$$I_{em} = \frac{I_0}{1 + \exp\left(\frac{\Delta E}{kT}\right)} \quad (\text{S.1})$$

where

$I_{em}$ - emission intensity

$I_0$ - emission intensity at the lowest temperature

$\Delta E$ - activation energy

T-temperature

k- Boltzmann constant

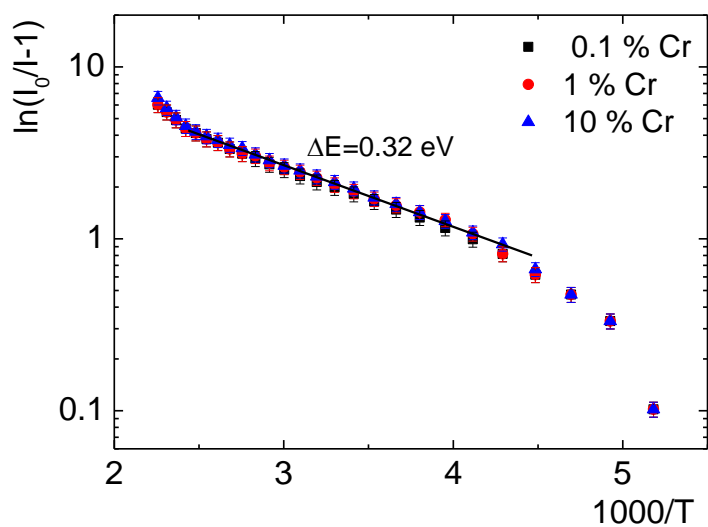

Fig. S5. Temperature dependence of emission intensity of  $\text{LiLaP}_4\text{O}_{12}:\text{Cr}$  nanocrystals

Reproducibility of temperature measurement using  $\text{LiLaP}_4\text{O}_{12}:1\% \text{Cr}^{3+}, 10\% \text{Nd}^{3+}$  nanocrystals as a luminescent thermometer was confirmed via 6 cooling-heating cycles measurements at two temperatures  $0^\circ\text{C}$  and  $50^\circ\text{C}$ . At each temperature emission spectra was recorded after 3 minutes.

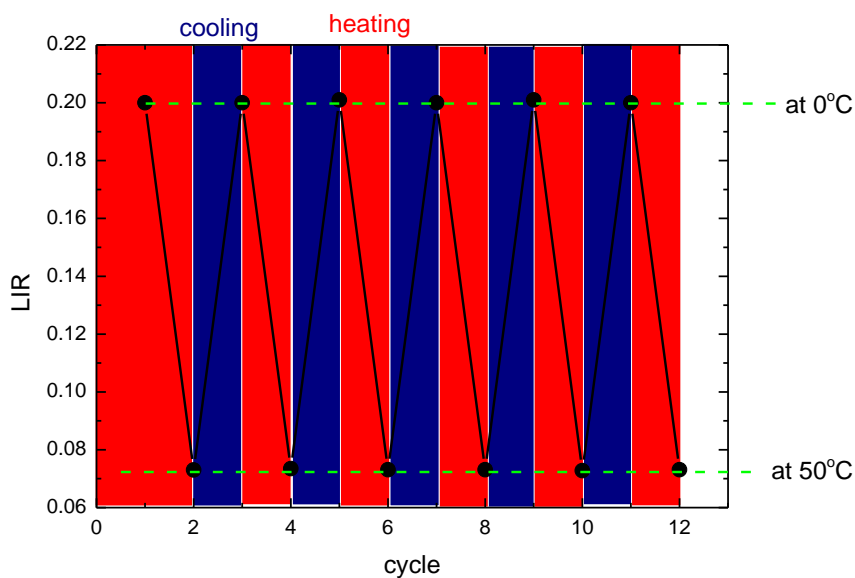

Fig. S6 Reproducibility of LIR measurements for  $\text{LiLaP}_4\text{O}_{12}:1\% \text{Cr}^{3+}, 10\% \text{Nd}^{3+}$  nanocrystals in cooling-heating cycles.
